# Supplementary material for: Nivolumab plus Ipilimumab versus Existing Immunotherapies in Patients with PD-L1-Positive Advanced Non-Small Cell Lung Cancer: A Systematic Review and Network Meta-Analysis
Source: PubMed Central journal article supplement (PMC7409193; doi:10.3390/cancers12071905), 2020-07-15
Supplement: cancers-12-01905-s001.pdf [file cancers-12-01905-s001.pdf]

## Supplementary Materials

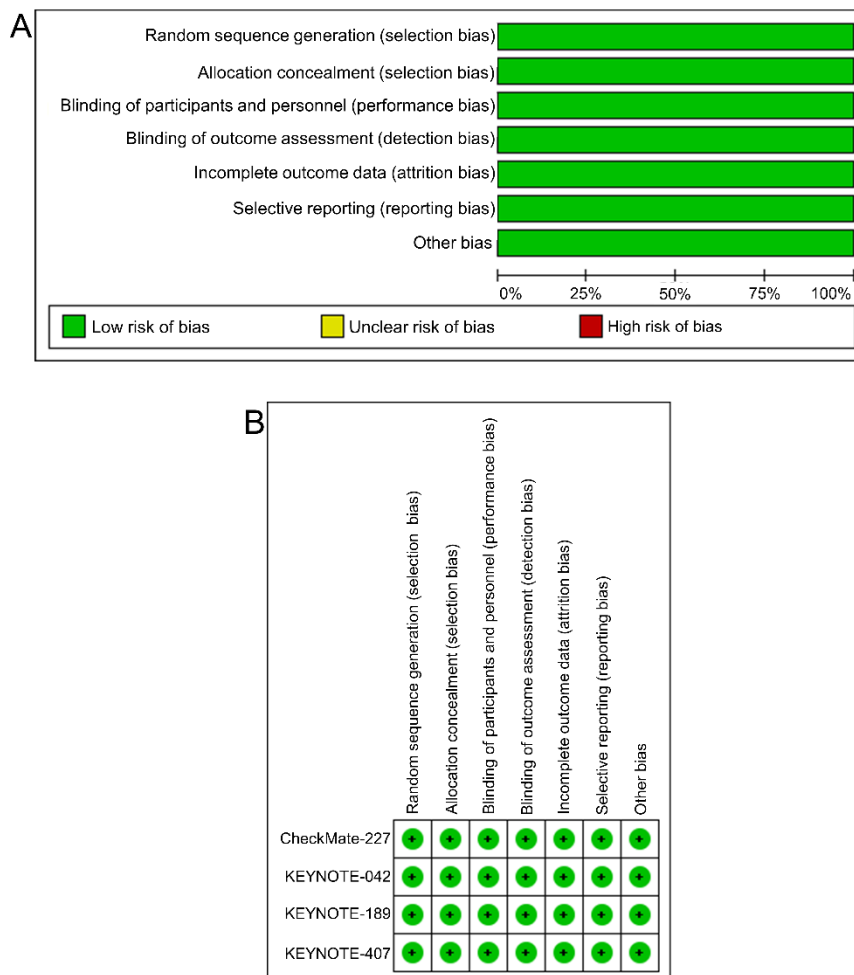

**Figure S1:** Risk-of-bias graph and summary. **(A)** Risk-of-bias graph: review of judgment in terms of each risk-of-bias item shown as percentages across all included studies. **(B)** Risk-of-bias summary: review of authors' judgments in terms of each risk-of-bias item for each included study.

**Table S1:** Sensitivity analysis

| Treatment comparisons | PFS                 |                     | OS                  |                     |
|-----------------------|---------------------|---------------------|---------------------|---------------------|
|                       | PD-L1 ≥ 1%          | PD-L1 ≥ 50%         | PD-L1 ≥ 1%          | PD-L1 ≥ 50%         |
| Niv vs. PBC           | 0.994 (0.798–1.225) | 0.787 (0.558–1.079) | 0.885 (0.691 1.116) | 0.818 (0.567–1.143) |
| Pem vs. PBC           | 1.072 (0.943–1.213) | 0.814 (0.666–0.984) | 0.812 (0.708 0.927) | 0.694 (0.560–0.849) |
| Pem+PBC vs. PBC       | 0.444 (0.339–0.569) | 0.432 (0.259–0.678) | 0.477 (0.337 0.654) | 0.432 (0.259–0.678) |
| Niv+Ipi vs. PBC       | 0.823 (0.708–0.950) | 0.625 (0.488–0.788) | 0.793 (0.668 0.935) | 0.706 (0.547–0.896) |
| Pem vs. Niv           | 1.091 (0.845–1.387) | 1.064 (0.712–1.530) | 0.931 (0.701 1.213) | 0.875 (0.570–1.287) |
| Pem+PBC vs. Niv       | 0.451 (0.318–0.623) | 0.565 (0.301–0.971) | 0.547 (0.354 0.806) | 0.546 (0.286–0.947) |
| Niv+Ipi vs. Niv       | 0.832 (0.710–0.970) | 0.805 (0.637–1.005) | 0.903 (0.758 1.068) | 0.877 (0.678–1.116) |
| Pem+PBC vs. Pem       | 0.415 (0.308–0.548) | 0.537 (0.308–0.871) | 0.590 (0.405 0.830) | 0.630 (0.360–1.026) |
| Niv+Ipi vs. Pem       | 0.770 (0.632–0.930) | 0.775 (0.563–1.042) | 0.982 (0.787 1.210) | 1.029 (0.736–1.401) |
| Niv+Ipi vs. Pem+PBC   | 1.887 (1.385–2.513) | 1.536 (0.864–2.533) | 1.713 (1.160 2.443) | 1.734 (0.972–2.870) |

Sensitivity analysis performed excluding KEYNOTE-407[36]. Data are expressed as hazard ratio and 95% credible intervals. PFS, progression free survival; OS, overall survival; PD-L1, programmed cell death ligand 1; Niv, nivolumab; PBC, platinum-based chemotherapy; Pem, pembrolizumab; Ipi, ipilimumab.

**Table S2:** Sensitivity analysis for ranking assessment

| Treatment comparisons | SUCRA for PFS [rank] |                  | SUCRA for OS [rank] |                  |
|-----------------------|----------------------|------------------|---------------------|------------------|
|                       | PD-L1 $\geq$ 1%      | PD-L1 $\geq$ 50% | PD-L1 $\geq$ 1%     | PD-L1 $\geq$ 50% |
| PBC                   | 32.9 [3]             | 2.1 [5]          | 3.7 [5]             | 2.9 [5]          |
| Niv                   | 32.2 [4]             | 39.3 [3]         | 31.3 [4]            | 31.7 [4]         |
| Pem                   | 10.4 [5]             | 36.2 [4]         | 53.3 [3]            | 58.5 [3]         |
| Pem+PBC               | 100.0 [1]            | 97.4 [1]         | 99.9 [1]            | 98.0 [1]         |
| Niv+Ipi               | 74.6 [2]             | 75.1 [2]         | 61.9 [2]            | 59.0 [2]         |

Sensitivity analysis performed excluding KEYNOTE-407[36]. Data are expressed as surface under the cumulative ranking curve (SUCRA) and efficacy rank within each treatment regimen. PFS, progression free survival; OS, overall survival; PD-L1, programmed cell death ligand 1; Niv, nivolumab; PBC, platinum-based chemotherapy; Pem, pembrolizumab; Ipi, ipilimumab.
